# Supplementary material
Source: PubMed Central journal article supplement (PMC9398212)
Supplement: mmc1.pdf [file mmc1.pdf]

# THE LANCET

## Digital Health

### Supplementary appendix

This appendix formed part of the original submission and has been peer reviewed.  
We post it as supplied by the authors.

Supplement to: Kuan PX, Chan WK, Fern Ying DK, et al. Efficacy of telemedicine for the management of cardiovascular disease: a systematic review and meta-analysis. *Lancet Digit Health* 2022; **4**: e676–691.

## SUPPLEMENTARY MATERIAL

### **Efficacy of telemedicine for the management of cardiovascular disease: a systematic review and meta-analysis**

Pei Xuan Kuan, MScCT<sup>1,2</sup>, Weng Ken Chan, DrAnaesCritCare<sup>3</sup>, Denisa Khoo Fern Ying, BDS<sup>4</sup>, Mohd Aizuddin Abdul Rahman, MBBS<sup>1</sup>, Kalaiarasu M Peariasamy, FDSRCS<sup>1,5</sup>, Nai Ming Lai, MRCPCH<sup>5</sup>, Nicholas L Mills, PhD<sup>6,7</sup>, Atul Anand, PhD<sup>6</sup>

<sup>1</sup> Digital Health Research and Innovation, Institute for Clinical Research, National Institutes of Health Malaysia

<sup>2</sup> College of Medicine and Veterinary Medicine, University of Edinburgh, Edinburgh, UK

<sup>3</sup> Anaesthesiology and Intensive Care, Sarawak General Hospital, Ministry of Health Malaysia

<sup>4</sup> Paediatric Dental Department, Sungai Buloh Hospital, Ministry of Health Malaysia

<sup>5</sup> School of Medicine, Faculty of Health and Medical Sciences, Taylor's University, Malaysia

<sup>6</sup> BHF Centre for Cardiovascular Science, University of Edinburgh, Edinburgh, UK

<sup>7</sup> Usher Institute, University of Edinburgh, Edinburgh, UK

**Short Title:** Telemedicine and cardiovascular disease

**Corresponding author:**

Dr Atul Anand

BHF Centre for Cardiovascular Science

University of Edinburgh

Edinburgh EH16 4SA

United Kingdom

Telephone: +44 131 242 6515

Fax: +44 131 242 6379

Email: [atul.anand@ed.ac.uk](mailto:atul.anand@ed.ac.uk)

## **Contents**

|                                                                                                                                       |                |
|---------------------------------------------------------------------------------------------------------------------------------------|----------------|
| <b>Appendix 1:</b> Search strategy (PubMed example).                                                                                  | <b>Page 3</b>  |
| <b>Appendix 2:</b> Summary of secondary prevention cardiovascular disease studies.                                                    | <b>Page 5</b>  |
| <b>Appendix 3:</b> Summary of primary prevention cardiovascular disease studies.                                                      | <b>Page 10</b> |
| <b>Appendix 4:</b> Risk of cardiovascular mortality in heart failure studies of remote consultation suitable for meta-analysis.       | <b>Page 13</b> |
| <b>Appendix 5:</b> Risk of cardiovascular hospitalisation in heart failure studies of remote consultation suitable for meta-analysis. | <b>Page 14</b> |
| <b>Appendix 6:</b> Risk of all-cause hospitalisation in heart failure studies suitable for meta-analysis.                             | <b>Page 15</b> |
| <b>Appendix 7:</b> Changes in blood pressure and body mass index in studies suitable for meta-analysis.                               | <b>Page 16</b> |
| <b>Appendix 8:</b> Cochrane risk of bias summary per study.                                                                           | <b>Page 17</b> |
| <b>Appendix 9:</b> Cochrane risk of bias graphical summary.                                                                           | <b>Page 18</b> |
| <b>Appendix 10:</b> Newcastle-Ottawa Scale quality assessment.                                                                        | <b>Page 19</b> |
| <b>Appendix 11:</b> Publication bias assessment.                                                                                      | <b>Page 20</b> |
| <b>References</b>                                                                                                                     | <b>Page 21</b> |

**Appendix 1:** Search Strategy (PubMed example shown).

1. ((((((Cardiovascular disease[Title/Abstract]) OR (CVD[Title/Abstract])) OR (myocardial infarction[Title/Abstract])) OR (MI[Title/Abstract])) OR (cardiac rehabilitation[Title/Abstract])) OR (coronary[Title/Abstract])) OR (heart[Title/Abstract])
2. (((((((((((((((digital health[Title/Abstract]) OR (mobile health[Title/Abstract])) OR (mHealth[Title/Abstract])) OR (eHealth[Title/Abstract])) OR (web[Title/Abstract])) OR (internet[Title/Abstract])) OR (telemedicine[Title/Abstract])) OR (biosensor[Title/Abstract])) OR (remote monitoring[Title/Abstract])) ) OR (wearable[Title/Abstract])) OR (artificial intelligence[Title/Abstract])) OR (AI[Title/Abstract])) OR (virtual care[Title/Abstract])) OR (online[Title/Abstract])) OR (information technology[Title/Abstract])
3. ((conventional management[Title/Abstract]) OR (standard treatment[Title/Abstract])) OR (non-digital health intervention[Title/Abstract])
4. (((((((((((((((CVD events[Title/Abstract]) OR (hospitalization[Title/Abstract])) OR (morbidity[Title/Abstract])) OR (mortality[Title/Abstract])) OR (Framingham score[Title/Abstract])) OR (risk factor modification[Title/Abstract])) OR (blood pressure[Title/Abstract])) OR (glucose[Title/Abstract])) OR (lipid[Title/Abstract])) OR (weight[Title/Abstract])) OR (BMI[Title/Abstract])) OR (medication adherence[Title/Abstract])) OR (quality of life[Title/Abstract])) OR (cost[Title/Abstract])) OR (smoking[Title/Abstract])) OR (physical activity[Title/Abstract])
5. ((((((cardiovascular disease[MeSH Terms]) OR (CVD[MeSH Terms])) OR ("myocardial infarction"[MeSH Terms])) OR (MI[MeSH Terms])) OR ("cardiac rehabilitation"[MeSH Terms]) AND (coronary[MeSH Terms])) AND (heart[MeSH Terms])
6. (((((((((((((((digital health[MeSH Terms]) OR (mobile health[MeSH Terms])) OR (mHealth[MeSH Terms])) OR (ehealth[MeSH Terms])) OR (web[MeSH Terms])) OR (internet[MeSH Terms])) OR (telemedicine[MeSH Terms])) OR (biosensor[MeSH Terms])) OR (remote monitoring[MeSH Terms])) OR (wearable[MeSH Terms])) OR (artificial intelligence[MeSH Terms])) OR (AI[MeSH Terms])) OR (virtual care[MeSH Terms])) OR (online[MeSH Terms])) OR (information technology[MeSH Terms])
7. ((conventional management[MeSH Terms]) OR (standard treatment[MeSH Terms])) OR (non-digital health intervention[MeSH Terms])
8. (((((((((((((((CVD events[MeSH Terms]) OR (hospitalization[MeSH Terms])) OR (morbidity[MeSH Terms])) OR ("mortality"[MeSH Terms])) OR (Framingham score[MeSH Terms])) OR (risk factor modification[MeSH Terms])) OR (blood pressure[MeSH Terms]))

OR ("glucose"[MeSH Terms]) OR (lipid[MeSH Terms]) OR (weight[MeSH Terms]) OR (BMI[MeSH Terms]) OR ("medication adherence"[MeSH Terms]) OR (quality of life[MeSH Terms]) OR (cost[MeSH Terms]) OR ("smoking"[MeSH Terms]) OR (physical activity[MeSH Terms])

9. (#1) OR (#5)

10. (#2) OR (#6)

11. (#3) OR (#7)

12. (#4) OR (#8)

13. (((#9) AND (#10)) AND (#11)) AND (#12)

## Appendix 2: Summary of secondary prevention cardiovascular disease studies.

| Author (Year)               | Country | Study Design                | Total (N) | Subject Characteristics (Age in years, Gender) | Duration (months) | Telemedicine (n) | Telemedicine Intervention                                                                                                              | WHO Classification                                                                                                                                          | Key Findings                                                                                                                                                                                                                                                       |
|-----------------------------|---------|-----------------------------|-----------|------------------------------------------------|-------------------|------------------|----------------------------------------------------------------------------------------------------------------------------------------|-------------------------------------------------------------------------------------------------------------------------------------------------------------|--------------------------------------------------------------------------------------------------------------------------------------------------------------------------------------------------------------------------------------------------------------------|
| Avila (2018) <sup>1</sup>   | Belgium | Randomized controlled trial | 90        | Mean age (SD) = 61.2 (7.6)<br>Male (n=80)      | 3                 | 30               | Email, telephone consultations, data monitoring (HR)                                                                                   | Consultations between remote patient and healthcare provider<br><br>Remote monitoring of patient health or remote monitoring of diagnostic data by provider | A telemedicine guided physical fitness programme for patients with coronary artery disease was associated with increased peak oxygen uptake, but no significant changes in body mass index, lipids and other risk factors.                                         |
| Bhavani (2018) <sup>2</sup> | India   | Randomized controlled trial | 254       | Mean age (SD) = 39.0 (14.0)<br>Male (n=146)    | 12                | 139              | Smartphone-connected mHealth device (pocket ECG, BP, SPO2, activity monitoring, portable brain natriuretic peptide laboratory testing) | Remote monitoring of patient health or remote monitoring of diagnostic data by provider                                                                     | For these patients with structural heart disease, there was a shorter time to referral for valvuloplasty, lower risk of a composite of hospitalisation or mortality in the telemedicine group assessed with a pocket echocardiography device compared to controls. |
| Blasco (2012) <sup>3</sup>  | Spain   | Randomized controlled trial | 203       | Mean age (SD) = 60.8 (11.8)<br>Male (n=163)    | 12                | 102              | SMS consultation, web-based application, data monitoring (BP, HR, weight, glucose and lipids)                                          | Consultations between remote patient and healthcare provider<br><br>Remote monitoring of patient health or remote monitoring of diagnostic data by provider | The telemonitoring intervention group had improvements in achieved BP and HbA <sub>1c</sub> treatment goals, with reductions in body mass compared to control groups. No differences were achieved in smoking cessation or lipids.                                 |
| Devi (2014) <sup>4</sup>    | UK      | Randomized controlled trial | 94        | Mean age (SD) = 66.2 (9.2)<br>Male (n=70)      | 6                 | 48               | Interactive web-based intervention                                                                                                     | Consultations between remote patient and healthcare provider                                                                                                | Intervention improvements noted in energy expenditure, duration of sedentary and moderate activity, reductions of weight, and angina frequency at 6 weeks follow-up compared to controls, but more limited improvements persisted to 6 months.                     |

|                              |           |                             |     |                                            |     |     |                                                                                                              |                                                                                                                                                             |                                                                                                                                                                                                                |
|------------------------------|-----------|-----------------------------|-----|--------------------------------------------|-----|-----|--------------------------------------------------------------------------------------------------------------|-------------------------------------------------------------------------------------------------------------------------------------------------------------|----------------------------------------------------------------------------------------------------------------------------------------------------------------------------------------------------------------|
| Frederix (2015) <sup>5</sup> | Belgium   | Randomized controlled trial | 80  | Mean age (SD) = 60.5 (9.8)<br>Male (n=66)  | 4.5 | 40  | Email, SMS, data monitoring from motion sensor (blood lipid profile, glycaemic control, waist circumference) | Consultations between remote patient and healthcare provider<br><br>Remote monitoring of patient health or remote monitoring of diagnostic data by provider | A telemonitoring intervention group within a cardiac rehabilitation setting achieved improvements in oxygen uptake capacity compared to controls, but no significant change was noted in hospitalisation risk. |
| Reid (2012) <sup>6</sup>     | Canada    | Randomized controlled trial | 223 | Mean age (SD) = 56.4 (9.0)<br>Male (n=188) | 12  | 115 | Email consultation, website, data monitoring via pedometer (steps/day)                                       | Consultations between remote patient and healthcare provider<br><br>Remote monitoring of patient health or remote monitoring of diagnostic data by provider | An internet-based tailored physical activity telemedicine system with guided advice increased objectively measured and self-reported physical activity compared to controls.                                   |
| Rosario (2018) <sup>7</sup>  | Australia | Randomized controlled trial | 66  | Age range= 42.0-86.0<br>Male (n=42)        | 3.5 | 33  | Data monitoring via mHealth smartphone (BP, weight)                                                          | Remote monitoring of patient health or remote monitoring of diagnostic data by provider                                                                     | A telemedicine addition to cardiac rehabilitation was associated with greater physical participation and completion of the rehabilitation programme, but no changes in risk factors compared to controls.      |
| Sankaran (2019) <sup>8</sup> | Belgium   | Randomized controlled trial | 32  | Mean age (SD) = 60.9 (8.2)<br>Male (n=24)  | 4   | 16  | Data monitoring via app for cardiac rehabilitation (physical activity)                                       | Remote monitoring of patient health or remote monitoring of diagnostic data by provider                                                                     | A telemedicine rehabilitation programme was associated with improvements in glycated haemoglobin, lipids and maximal oxygen capacity compared to controls in this small randomised study.                      |
| Southard (2003) <sup>9</sup> | USA       | Randomized controlled trial | 104 | Mean age (SD) = 62.3 (10.6)<br>Male (n=78) | 6   | 53  | Internet-based case management system                                                                        | Consultations between remote patient and healthcare provider                                                                                                | A telemedicine enhanced cardiac rehabilitation programme was associated with greater weight loss compared to controls, but other measures were not significantly different.                                    |
| Thorup (2016) <sup>10*</sup> | Denmark   | Randomized controlled trial | 64  | Mean age (SD) = 62.8 (11.5)                | 12  | 64  | Tablet, data monitoring (BP, pulse rate, weight,                                                             | Remote monitoring of patient health or remote monitoring                                                                                                    | Increased mean (SD) walking steps per day from 5191 (3198) to 7890 (2629) among                                                                                                                                |

|                               |                 |                             |      |                                             |    |     |                                                                                  |                                                                                                                                                             |                                                                                                                                                                                                                                   |
|-------------------------------|-----------------|-----------------------------|------|---------------------------------------------|----|-----|----------------------------------------------------------------------------------|-------------------------------------------------------------------------------------------------------------------------------------------------------------|-----------------------------------------------------------------------------------------------------------------------------------------------------------------------------------------------------------------------------------|
|                               |                 |                             |      | Male (n=51)                                 |    |     | daily steps)                                                                     | of diagnostic data by provider                                                                                                                              | cardiacpatients with remote monitoring; notably more among younger patients with better adherence to the pedometer.                                                                                                               |
| Varma (2014) <sup>11</sup>    | USA             | Randomized controlled trial | 1450 | Mean age (SD) = 63.5 (12.6)<br>Male (n=969) | 15 | 908 | Data monitoring for implantable cardioverter defibrillator                       | Remote monitoring of patient health or remote monitoring of diagnostic data by provider                                                                     | Remote monitoring of implantable cardiac devices associated with no change in all-cause mortality compared to conventionally managed patients, but did achieve reduced in-hospital device adjustments.                            |
| Vernooij (2012) <sup>12</sup> | The Netherlands | Randomized controlled trial | 330  | Mean age (SD) = 59.9 (8.4)<br>Male (n=246)  | 12 | 155 | Internet consultation, data monitoring (BP, weight, smoking status, cholesterol) | Consultations between remote patient and healthcare provider<br><br>Remote monitoring of patient health or remote monitoring of diagnostic data by provider | Reduction (-14%) in the Framingham heart risk score, LDL-C and smoking in the telemedicine intervention group compared with the usual care group.                                                                                 |
| Wister (2007) <sup>13**</sup> | Canada          | Randomized controlled trial | 296  | Mean age (SD) = 56.9 (5.1)<br>Male (n=204)  | 12 | 153 | Telehealth counselling                                                           | Consultations between remote patient and healthcare provider                                                                                                | No changes in outcome variables including blood pressure and Framingham risk scores were found for secondary prevention patients receiving a telemedicine intervention compared to controls.                                      |
| Wolf (2016) <sup>14</sup>     | Sweden          | Randomized controlled trial | 199  | Mean age (SD) = 60.0 (10.0)<br>Male (n=144) | 6  | 94  | Website, data monitoring via ehealth diary and symptom tracking tool             | Remote monitoring of patient health or remote monitoring of diagnostic data by provider                                                                     | Improvement in a composite primary endpoint including hospitalisation and death among the person-centred telemedicine group admitted to hospital with acute coronary syndrome, compared to controls.                              |
| Zutz (2007) <sup>15</sup>     | Canada          | Randomized controlled trial | 15   | Mean age (SD) = 58.5 (8.4)<br>Male (n=12)   | 3  | 8   | Internet-based consultation for cardiac rehabilitation                           | Consultations between remote patient and healthcare provider                                                                                                | Very small study assessing virtual cardiac rehabilitation programme, with those participating achieving similar improvements in lipids and exercise capacity to historical controls from a conventional rehabilitation programme. |



|                                 |           |                                 |     |                                                 |    |     |                                                                                  |                                                                                                                                                             |                                                                                                                                                                                                                                                             |
|---------------------------------|-----------|---------------------------------|-----|-------------------------------------------------|----|-----|----------------------------------------------------------------------------------|-------------------------------------------------------------------------------------------------------------------------------------------------------------|-------------------------------------------------------------------------------------------------------------------------------------------------------------------------------------------------------------------------------------------------------------|
| Ades (2000) <sup>16</sup>       | USA       | Non-randomized controlled trial | 133 | Mean age (SD) = 56.8 (10.2)<br>Male (n=108)     | 3  | 83  | Conference call, data monitoring via trans telephonic                            | Consultations between remote patient and healthcare provider<br><br>Remote monitoring of patient health or remote monitoring of diagnostic data by provider | Telemedicine cardiac rehabilitation programme associated with similar changes in oxygen capacity, but an increase in body weight compared to usual rehabilitation.                                                                                          |
| Macedo (2016) <sup>17</sup>     | Brazil    | Cohort study                    | 376 | Mean age (SD) = 59.0 (11.6)<br>Male (n=276)     | 24 | 376 | Internet for teleconsultation, discussion of clinical cases via teleconferencing | Consultations between remote patient and healthcare provider<br><br>Consultations for case management between healthcare providers                          | The use of chest pain protocols with access to telemedicine was associated with a greater use of a pharmacoinvasive strategy and a trend toward lower in-hospital mortality compared to patients from before the introduction of the new protocols.         |
| Parahuleva (2017) <sup>18</sup> | Germany   | Cohort study                    | 364 | Mean age (SD) = 65.5 (N/A)<br>Male (n=278)      | 72 | 217 | Data monitoring of cardiac implantable electronic devices                        | Remote monitoring of patient health or remote monitoring of diagnostic data by provider                                                                     | Home monitoring of implantable cardiac devices was associated with fewer treatment-related adverse events compared to standard managed patients.                                                                                                            |
| Wong (2016) <sup>19</sup>       | Singapore | Cohort study                    | 492 | Mean age (SD) = 59.0 (10.3)<br>Male (n=393)     | 12 | 395 | Telephone consultation                                                           | Consultations between remote patient and healthcare provider                                                                                                | A nurse-led telephone-based care coordination and management intervention in patients post-coronary intervention achieved greater target lipid concentrations compared to controls, but there was no difference in rates of cardiovascular hospitalisation. |
| Ammenwerth (2015) <sup>20</sup> | Austria   | Cohort study                    | 25  | Mean age= 63.0; range= 47.0-89.0<br>Male (n=24) | 12 | 25  | Data monitoring via app in smart phone (BP, weight, glucose)                     | Remote monitoring of patient health or remote monitoring of diagnostic data by provider                                                                     | High medication adherence after 4 and 18 weeks of telemonitoring, but without significant changes to blood pressure or heart rate.                                                                                                                          |

|                           |        |              |    |                                                  |   |    |                           |                                                                       |                                                                                                                                                                                                                 |
|---------------------------|--------|--------------|----|--------------------------------------------------|---|----|---------------------------|-----------------------------------------------------------------------|-----------------------------------------------------------------------------------------------------------------------------------------------------------------------------------------------------------------|
| Hart (2019) <sup>21</sup> | Canada | Cohort study | 90 | Mean age (SD)<br>= 68.9 (9.8)<br><br>Male (n=48) | 6 | 90 | Telephone<br>consultation | Consultations<br>between remote<br>patient and<br>healthcare provider | A nurse-led telemedicine<br>intervention for atrial fibrillation<br>patients was associated with<br>reduced atrial fibrillation related<br>hospital visits compared to those<br>not receiving the intervention. |
|---------------------------|--------|--------------|----|--------------------------------------------------|---|----|---------------------------|-----------------------------------------------------------------------|-----------------------------------------------------------------------------------------------------------------------------------------------------------------------------------------------------------------|

\*This study also included heart failure patients

\*\*This study also included primary prevention patients

### Appendix 3: Summary of primary prevention cardiovascular disease studies.

| Author (Year)                    | Country         | Study Design                | Total (N) | Subject Characteristics (Age in years, Gender) | Duration (months) | Telemedicine (n) | Telemedicine Intervention                                             | WHO Classification                                                                                                                                          | Key Findings                                                                                                                                                                                               |
|----------------------------------|-----------------|-----------------------------|-----------|------------------------------------------------|-------------------|------------------|-----------------------------------------------------------------------|-------------------------------------------------------------------------------------------------------------------------------------------------------------|------------------------------------------------------------------------------------------------------------------------------------------------------------------------------------------------------------|
| Appel (2011) <sup>22</sup>       | USA             | Randomized controlled trial | 415       | Mean age (SD) = 54.0 (10.2)<br>Male (n=151)    | 24                | 277              | Telephone consultation, website, email, data monitoring (weight)      | Consultations between remote patient and healthcare provider<br><br>Remote monitoring of patient health or remote monitoring of diagnostic data by provider | Body weight was reduced from baseline for both telemedicine intervention and control groups, without significant difference.                                                                               |
| Bennett (2010) <sup>23</sup>     | USA             | Randomized controlled trial | 101       | Mean age (SD) = 54.4 (8.1)<br>Male (n=53)      | 3                 | 51               | Web-based intervention with consultation using messaging feature      | Consultations between remote patient and healthcare provider                                                                                                | Obese patients randomised to a telemedicine intervention including counselling achieved greater weight loss than controls.                                                                                 |
| Bennett (2012) <sup>24</sup>     | UK              | Randomized controlled trial | 365       | Mean age (SD) = 54.6 (10.9)<br>Male (n=115)    | 24                | 180              | Tele counselling                                                      | Consultations between remote patient and healthcare provider                                                                                                | A telemedicine backed intervention for obese patients from socioeconomically disadvantaged backgrounds achieved reductions in body weight greater than controls, but no change in blood pressure was seen. |
| Broekhuizen (2012) <sup>25</sup> | The Netherlands | Randomized controlled trial | 340       | Mean age (SD) = 45.3 (12.9)<br>Male (n=147)    | 12                | 181              | Personalised health counselling via web-based and telephone           | Consultations between remote patient and healthcare provider                                                                                                | No differences seen in risk markers including lipids between telemedicine-backed lifestyle intervention for patients with familial hypercholesterolaemia and controls.                                     |
| Claes (2013) <sup>26</sup>       | Belgium         | Randomized controlled trial | 314       | Mean age (SD) = 40.7 (10.5)<br>Male (n=219)    | 36                | 195              | Personalised website, consultation via regular mail, email, telephone | Consultations between remote patient and healthcare provider                                                                                                | A remote lifestyle modification programme in addition to medical care did not result in significant differences in lipids, body weight or blood pressure.                                                  |
| Green (2014) <sup>27</sup>       | USA             | Randomized                  | 101       | Mean age (SD)                                  | 18                | 51               | Web-based dietitian,                                                  | Consultations                                                                                                                                               | A remote dietitian intervention                                                                                                                                                                            |

|                                 |                   |                             |     |                                             |    |     |                                                                                                                                                 |                                                                                                                                                             |                                                                                                                                                                                                    |
|---------------------------------|-------------------|-----------------------------|-----|---------------------------------------------|----|-----|-------------------------------------------------------------------------------------------------------------------------------------------------|-------------------------------------------------------------------------------------------------------------------------------------------------------------|----------------------------------------------------------------------------------------------------------------------------------------------------------------------------------------------------|
|                                 |                   | controlled trial            |     | = 56.9 (7.0)<br>Male (n=59)                 |    |     | communication via electronic health record linked secure messaging                                                                              | between remote patient and healthcare provider                                                                                                              | improved weight loss and blood pressure control compared to usual care, for patients with a high pre-intervention cardiac risk.                                                                    |
| Jacobs (2011) <sup>28</sup>     | Belgium           | Randomized controlled trial | 287 | Mean age (SD) = 40.0 (11.0)<br>Male (n=192) | 6  | 194 | Tailored website, one-to-one coaching (email, telephone)                                                                                        | Consultations between remote patient and healthcare provider                                                                                                | The cardiovascular events prevention programme did not alter outcomes compared to control patients.                                                                                                |
| Kiselev (2012) <sup>29</sup>    | Russia            | Randomized controlled trial | 199 | Mean age (SD) = 50.0 (11.0)<br>Male (n=110) | 12 | 97  | SMS and mobile phone technology                                                                                                                 | Consultations between remote patient and healthcare provider                                                                                                | Using mobile technology and messaging prompts resulted in improved blood pressure control compared to traditional ambulatory care management.                                                      |
| Mendelson (2014) <sup>30</sup>  | France            | Randomized controlled trial | 107 | Mean age (SD) = 63.0 (9.0)<br>Male (n=89)   | 4  | 54  | Telephone consultation, health-related messages via pictogram, smartphone, data monitoring (BP, CPAP adherence, sleepiness and quality of life) | Consultations between remote patient and healthcare provider<br><br>Remote monitoring of patient health or remote monitoring of diagnostic data by provider | The telemedicine group achieved no improvement in self-measured blood pressure compared to controls for patients with obstructive sleep apnoea managed using continuous positive airways pressure. |
| Verheijden (2004) <sup>31</sup> | Canada            | Randomized controlled trial | 146 | Mean age (SD) = 63.0 (10.5)<br>Male (n=111) | 8  | 73  | Web-based targeted nutrition counselling and social support                                                                                     | Consultations between remote patient and healthcare provider                                                                                                | Cardiac risk measures including blood pressure and lipids were not different in the telemedicine intervention group receiving web based monitoring and counselling when compared to controls.      |
| Wister (2007) <sup>13*</sup>    | Canada            | Randomized controlled trial | 315 | Mean age (SD) = 55.4 (5.4)<br>Male (n=131)  | 12 | 157 | Telehealth counselling                                                                                                                          | Consultations between remote patient and healthcare provider                                                                                                | Significant changes for the telemedicine treatment group relative to controls in Framingham score, lipids, blood pressure, nutrition level and health confidence.                                  |
| Park (2012) <sup>32</sup>       | Republic of Korea | Quasi-experimental          | 67  | Mean age (SD) = 56.7 (5.6)<br>All females   | 3  | 34  | Telephone or internet consultation, data monitoring (mobile phone and web-based diary internet)                                                 | Consultations between remote patient and healthcare provider                                                                                                | The telemedicine group had reductions in lipids, blood pressure and waist circumference in obese post-menopausal women, when compared to non-                                                      |

|                               |     |                 |     |                                                            |     |     |                                                                                     |                                                                                                                                                               |                                                                                                                                                                                            |
|-------------------------------|-----|-----------------|-----|------------------------------------------------------------|-----|-----|-------------------------------------------------------------------------------------|---------------------------------------------------------------------------------------------------------------------------------------------------------------|--------------------------------------------------------------------------------------------------------------------------------------------------------------------------------------------|
|                               |     |                 |     |                                                            |     |     |                                                                                     | Remote monitoring of patient health or remote monitoring of diagnostic data by provider                                                                       | randomised controls.                                                                                                                                                                       |
| Randolph (1999) <sup>33</sup> | USA | Cross-sectional | 133 | Median age 2 days (range 1 to 29 days)<br><br>Gender (N/A) | N/A | 133 | Telemedical echocardiograms, case management discussion on the teleechocardiography | Remote monitoring of patient health or remote monitoring of diagnostic data by provider<br><br>Consultations for case management between healthcare providers | Paediatric study transmitting neonatal echocardiogram images for remote review. Data transfer was felt adequate for diagnosis and medical management was altered in the majority of cases. |

\*This study also included secondary prevention patients

**Appendix 4:** Risk of cardiovascular mortality in heart failure studies of remote consultation suitable for meta-analysis.

**Remote Consultation for Heart Failure Management**

**Short-term Follow-up**

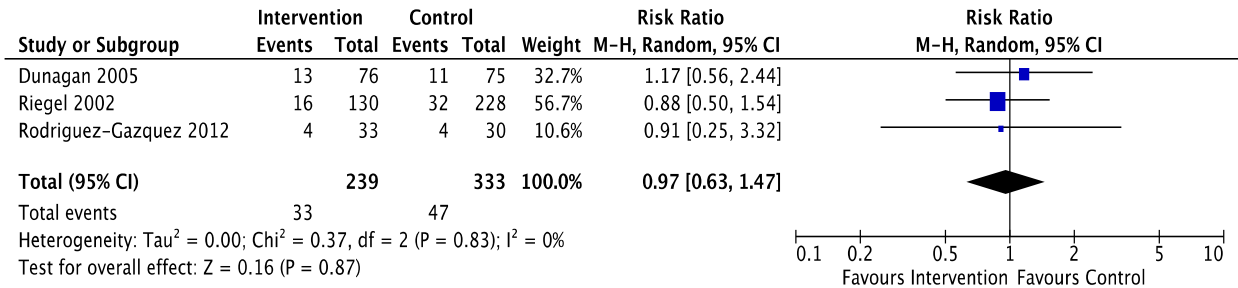

**Appendix 5:** Risk of cardiovascular hospitalisation in heart failure studies of remote consultation suitable for meta-analysis.

**Remote Consultation for Heart Failure Management**

**Short-term Follow-up**

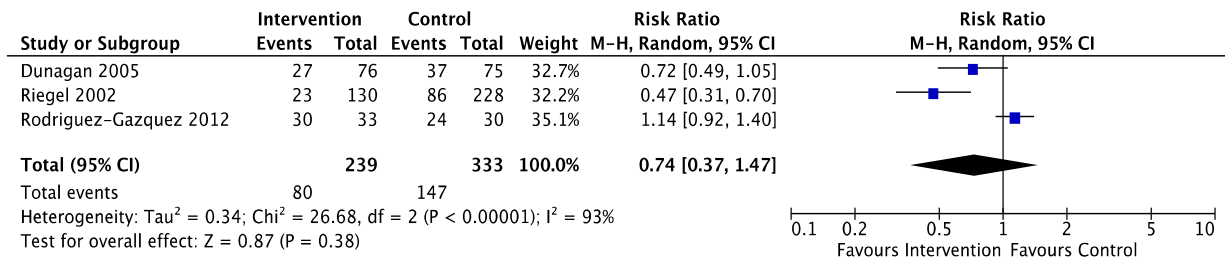

**Appendix 6:** Risk of all-cause hospitalisation in heart failure studies suitable for meta-analysis.

**Remote Monitoring for Heart Failure Management**

**Short-term Follow-up**

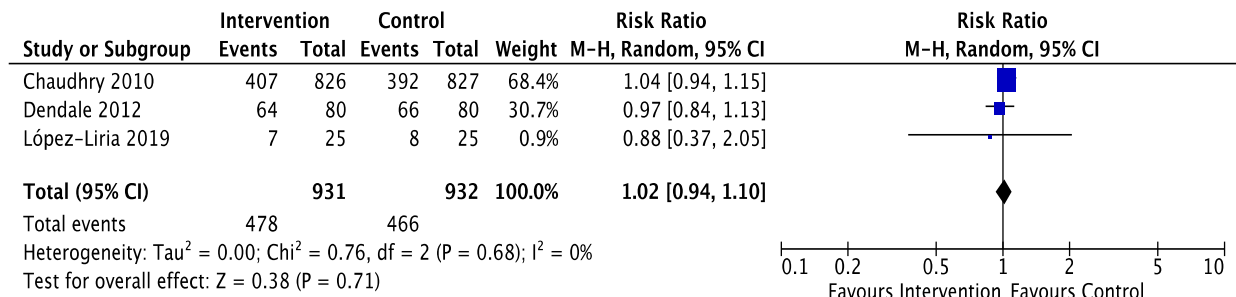



## Appendix 7: Changes in blood pressure and body mass index in studies suitable for meta-analysis.

### A. Remote Consultation for Primary CVD Prevention (Systolic Blood Pressure)

#### Short-term Follow-up

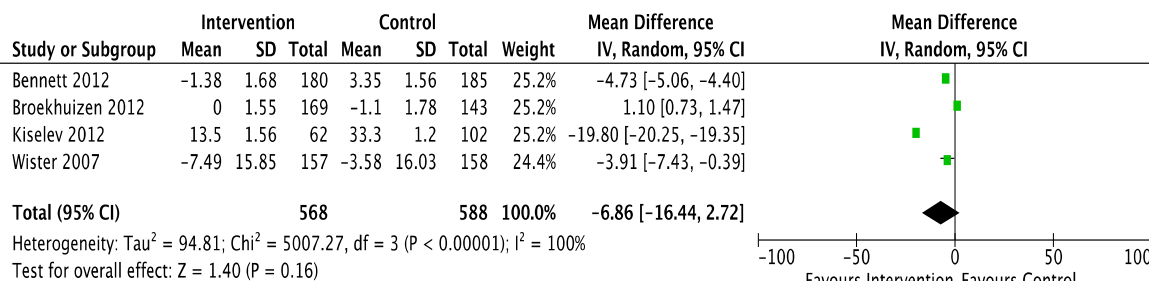

### B. Remote Consultation for Primary CVD Prevention (Systolic Blood Pressure)

#### Long-term Follow-up

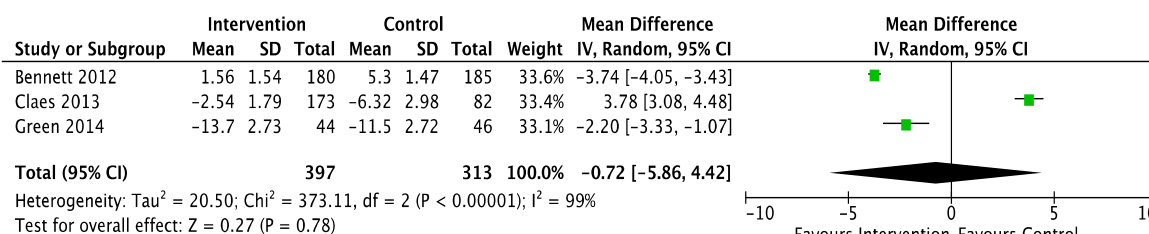

### C. Remote Consultation for Primary CVD Prevention (Diastolic Blood Pressure)

#### Long-term Follow-up

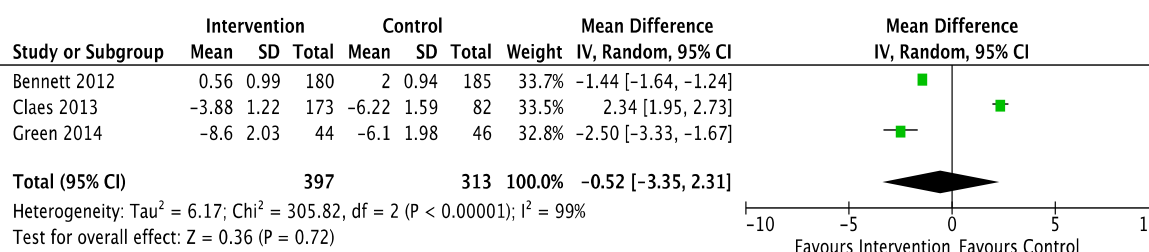

### D. Remote Monitoring and Consultation for Secondary CVD Prevention (BMI)

#### Short-term Follow-up

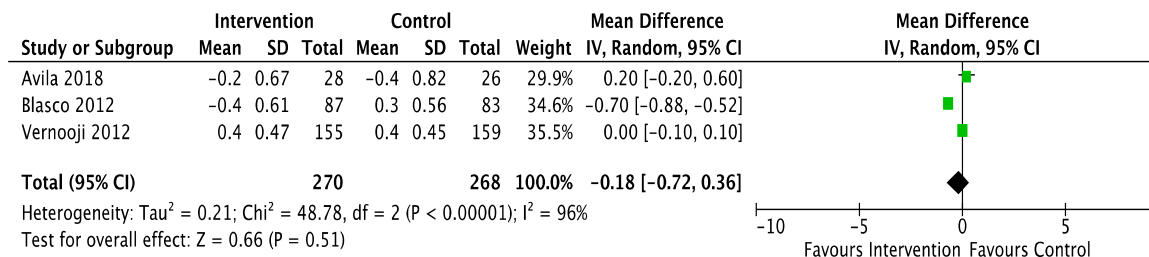

## Appendix 8: Cochrane risk of bias summary per study.

|                        | Random sequence generation (selection bias) | Allocation concealment (selection bias) | Blinding of participants and personnel (performance bias) | Blinding of outcome assessment (detection bias) | Incomplete outcome data (attrition bias) | Selective reporting (reporting bias) | Other bias |
|------------------------|---------------------------------------------|-----------------------------------------|-----------------------------------------------------------|-------------------------------------------------|------------------------------------------|--------------------------------------|------------|
| Antoniceilli 2008      | ?                                           | ?                                       | ●                                                         | ●                                               | ●                                        | ?                                    | ●          |
| Antoniceilli 2010      | ?                                           | ?                                       | ●                                                         | ●                                               | ●                                        | ?                                    | ●          |
| Appel 2011             | ●                                           | ●                                       | ●                                                         | ●                                               | ●                                        | ●                                    | ●          |
| Avila 2018             | ●                                           | ●                                       | ●                                                         | ●                                               | ●                                        | ●                                    | ●          |
| Bennett 2010           | ●                                           | ●                                       | ●                                                         | ●                                               | ●                                        | ?                                    | ●          |
| Bennett 2012           | ●                                           | ●                                       | ●                                                         | ●                                               | ●                                        | ●                                    | ●          |
| Bhavani 2018           | ●                                           | ●                                       | ●                                                         | ?                                               | ●                                        | ●                                    | ?          |
| Blasco 2012            | ?                                           | ●                                       | ●                                                         | ●                                               | ●                                        | ?                                    | ?          |
| Böhm 2016              | ●                                           | ●                                       | ●                                                         | ●                                               | ●                                        | ●                                    | ●          |
| Boriani 2017           | ●                                           | ●                                       | ●                                                         | ●                                               | ?                                        | ●                                    | ●          |
| Broekhuizen 2012       | ●                                           | ●                                       | ●                                                         | ?                                               | ●                                        | ●                                    | ●          |
| Chaudhry 2010          | ●                                           | ●                                       | ●                                                         | ●                                               | ●                                        | ●                                    | ●          |
| Claes 2013             | ●                                           | ●                                       | ●                                                         | ●                                               | ●                                        | ●                                    | ●          |
| Dendale 2012           | ●                                           | ?                                       | ?                                                         | ?                                               | ●                                        | ●                                    | ●          |
| Devi 2014              | ●                                           | ●                                       | ●                                                         | ●                                               | ?                                        | ●                                    | ●          |
| Dunagan 2005           | ●                                           | ●                                       | ●                                                         | ●                                               | ●                                        | ?                                    | ●          |
| Frederix 2015          | ●                                           | ?                                       | ●                                                         | ●                                               | ●                                        | ●                                    | ●          |
| Frederix 2019          | ●                                           | ●                                       | ●                                                         | ●                                               | ●                                        | ●                                    | ●          |
| Gingele 2019           | ?                                           | ?                                       | ?                                                         | ?                                               | ●                                        | ●                                    | ●          |
| Giordano 2009          | ●                                           | ●                                       | ●                                                         | ●                                               | ●                                        | ●                                    | ●          |
| Green 2014             | ●                                           | ?                                       | ●                                                         | ●                                               | ●                                        | ?                                    | ?          |
| Guédon-Moreau 2013     | ●                                           | ?                                       | ●                                                         | ●                                               | ●                                        | ●                                    | ●          |
| Jacobs 2011            | ?                                           | ?                                       | ●                                                         | ●                                               | ●                                        | ●                                    | ●          |
| Kiselev 2012           | ?                                           | ?                                       | ●                                                         | ●                                               | ●                                        | ?                                    | ●          |
| Koehler 2011           | ●                                           | ?                                       | ●                                                         | ●                                               | ●                                        | ●                                    | ●          |
| Koehler 2018           | ●                                           | ●                                       | ●                                                         | ●                                               | ●                                        | ●                                    | ●          |
| Kotooka 2018           | ●                                           | ●                                       | ?                                                         | ?                                               | ●                                        | ●                                    | ●          |
| Lear 2014              | ●                                           | ●                                       | ●                                                         | ●                                               | ●                                        | ●                                    | ●          |
| López-Liria 2019       | ●                                           | ●                                       | ●                                                         | ●                                               | ●                                        | ●                                    | ?          |
| Lundgren 2016          | ●                                           | ?                                       | ●                                                         | ●                                               | ●                                        | ?                                    | ?          |
| Lüthje 2015            | ?                                           | ?                                       | ●                                                         | ●                                               | ●                                        | ●                                    | ●          |
| Mendelson 2014         | ●                                           | ●                                       | ●                                                         | ●                                               | ●                                        | ●                                    | ●          |
| Morgan 2017            | ●                                           | ?                                       | ●                                                         | ●                                               | ●                                        | ●                                    | ●          |
| Piette 2015            | ●                                           | ?                                       | ●                                                         | ●                                               | ●                                        | ●                                    | ?          |
| Piotrowicz 2015        | ●                                           | ●                                       | ●                                                         | ●                                               | ●                                        | ?                                    | ?          |
| Rahimi 2020            | ●                                           | ●                                       | ●                                                         | ●                                               | ●                                        | ●                                    | ●          |
| Reid 2012              | ●                                           | ●                                       | ●                                                         | ●                                               | ●                                        | ●                                    | ●          |
| Riegel 2002            | ?                                           | ?                                       | ●                                                         | ●                                               | ●                                        | ?                                    | ●          |
| Rodriguez-Gazquez 2012 | ●                                           | ●                                       | ?                                                         | ?                                               | ?                                        | ●                                    | ?          |
| Rosario 2018           | ●                                           | ?                                       | ●                                                         | ●                                               | ●                                        | ●                                    | ?          |
| Sankaran 2019          | ●                                           | ?                                       | ●                                                         | ●                                               | ●                                        | ●                                    | ●          |
| Scherr 2009            | ?                                           | ?                                       | ?                                                         | ?                                               | ●                                        | ?                                    | ?          |
| Southard 2003          | ●                                           | ?                                       | ●                                                         | ●                                               | ●                                        | ●                                    | ●          |
| Tajstra 2020           | ●                                           | ●                                       | ●                                                         | ●                                               | ●                                        | ●                                    | ●          |
| Thorup 2016            | ●                                           | ?                                       | ●                                                         | ●                                               | ?                                        | ●                                    | ●          |
| Varma 2014             | ●                                           | ●                                       | ●                                                         | ●                                               | ●                                        | ●                                    | ●          |
| Verheijden 2004        | ●                                           | ?                                       | ●                                                         | ●                                               | ●                                        | ●                                    | ●          |
| Vernooji 2012          | ●                                           | ●                                       | ●                                                         | ●                                               | ●                                        | ●                                    | ?          |
| Weintraub 2010         | ●                                           | ?                                       | ?                                                         | ●                                               | ●                                        | ●                                    | ●          |
| Wister 2007            | ●                                           | ●                                       | ●                                                         | ●                                               | ●                                        | ?                                    | ●          |
| Wolf 2016              | ●                                           | ?                                       | ●                                                         | ?                                               | ●                                        | ●                                    | ●          |
| Zutz 2007              | ?                                           | ?                                       | ?                                                         | ?                                               | ●                                        | ?                                    | ?          |

**Appendix 9:** Cochrane risk of bias graphical summary.

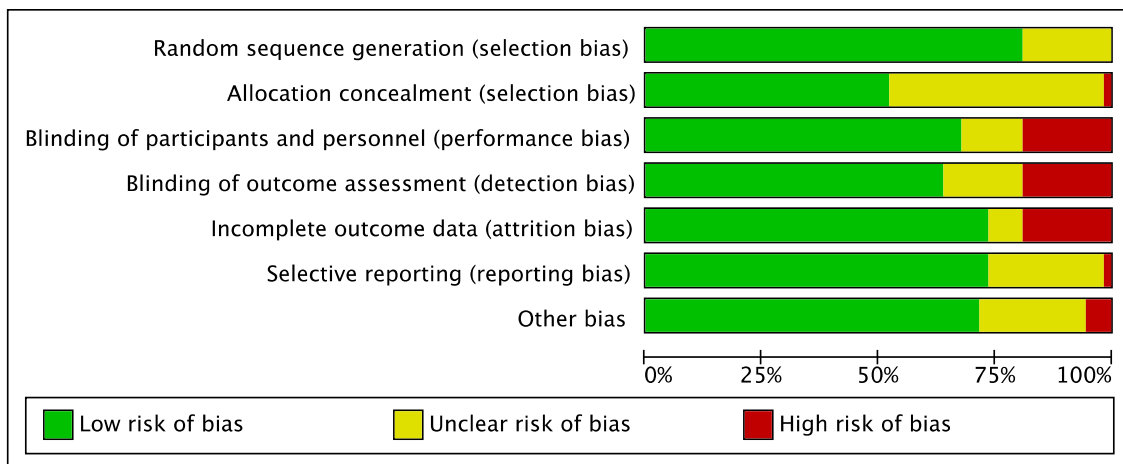

**Appendix 10:** Newcastle-Ottawa Scale quality assessment.

| <b>Study (Year)</b>   | <b>Representatives of the exposed cohort (star)</b> | <b>Selection of the nonexposed cohort (star)</b> | <b>Ascertainment of the exposure (star)</b> | <b>Demonstration that outcome of interest was not present at the start of the study (star)</b> | <b>Comparability of cohorts on the basis of the design or analysis controlled for confounders (star)</b> | <b>Assessment of outcome (star)</b> | <b>Was follow-up long enough for outcomes to occur (star)</b> | <b>Adequacy of follow-up of cohorts (star)</b> | <b>Quality</b> |
|-----------------------|-----------------------------------------------------|--------------------------------------------------|---------------------------------------------|------------------------------------------------------------------------------------------------|----------------------------------------------------------------------------------------------------------|-------------------------------------|---------------------------------------------------------------|------------------------------------------------|----------------|
| Ades (2000)           | 1                                                   | 1                                                | 1                                           | 0                                                                                              | 1                                                                                                        | 1                                   | 1                                                             | 1                                              | High           |
| Ammenwerth (2015)     | 1                                                   | 0                                                | 0                                           | 0                                                                                              | 0                                                                                                        | 0                                   | 1                                                             | 1                                              | Low            |
| Chen (2010)           | 1                                                   | 1                                                | 0                                           | 1                                                                                              | 1                                                                                                        | 0                                   | 1                                                             | 1                                              | Medium         |
| Dadosky (2018)        | 1                                                   | 1                                                | 1                                           | 1                                                                                              | 1                                                                                                        | 1                                   | 0                                                             | 1                                              | High           |
| Hart (2019)           | 1                                                   | 0                                                | 0                                           | 0                                                                                              | 0                                                                                                        | 0                                   | 1                                                             | 0                                              | Low            |
| Kurek (2017)          | 1                                                   | 1                                                | 1                                           | 0                                                                                              | 2                                                                                                        | 1                                   | 1                                                             | 1                                              | High           |
| Macedo (2016)         | 1                                                   | 0                                                | 1                                           | 1                                                                                              | 1                                                                                                        | 1                                   | 1                                                             | 1                                              | High           |
| Martín-Lesende (2017) | 1                                                   | 0                                                | 1                                           | 0                                                                                              | 0                                                                                                        | 1                                   | 1                                                             | 0                                              | Medium         |
| Masella (2008)        | 1                                                   | 0                                                | 1                                           | 0                                                                                              | 0                                                                                                        | 1                                   | 1                                                             | 0                                              | Medium         |
| Mittal (2016)         | 1                                                   | 1                                                | 1                                           | 0                                                                                              | 0                                                                                                        | 1                                   | 1                                                             | 1                                              | Medium         |
| Moore (2016)          | 1                                                   | 0                                                | 1                                           | 0                                                                                              | 0                                                                                                        | 0                                   | 1                                                             | 0                                              | Low            |
| Nishii (2015)         | 1                                                   | 0                                                | 1                                           | 1                                                                                              | 0                                                                                                        | 0                                   | 1                                                             | 1                                              | Medium         |
| Odeh (2015)           | 1                                                   | 0                                                | 1                                           | 0                                                                                              | 0                                                                                                        | 1                                   | 1                                                             | 0                                              | Medium         |
| Parahuleva 2017       | 1                                                   | 1                                                | 1                                           | 1                                                                                              | 1                                                                                                        | 1                                   | 1                                                             | 0                                              | High           |
| Park (2012)           | 1                                                   | 1                                                | 1                                           | 0                                                                                              | 2                                                                                                        | 1                                   | 1                                                             | 1                                              | High           |
| Quinn (2006)          | 1                                                   | 1                                                | 0                                           | 1                                                                                              | 0                                                                                                        | 0                                   | 1                                                             | 1                                              | Medium         |
| Randolph (1999)       | 1                                                   | 0                                                | 1                                           | 0                                                                                              | 0                                                                                                        | 1                                   | 0                                                             | 0                                              | Low            |
| Rosen (2017)          | 1                                                   | 0                                                | 1                                           | 0                                                                                              | 0                                                                                                        | 1                                   | 1                                                             | 1                                              | Medium         |
| Scalvini (2006)       | 1                                                   | 0                                                | 0                                           | 0                                                                                              | 0                                                                                                        | 1                                   | 1                                                             | 1                                              | Medium         |
| Wong (2016)           | 1                                                   | 1                                                | 1                                           | 0                                                                                              | 1                                                                                                        | 1                                   | 1                                                             | 1                                              | High           |

**Appendix 11:** Publication bias assessment.

Funnel plot to assess for publication bias in studies used for meta-analysis of cardiovascular mortality risk. Egger's tests for plot asymmetry does not support publication bias ( $p=0.93$ ).

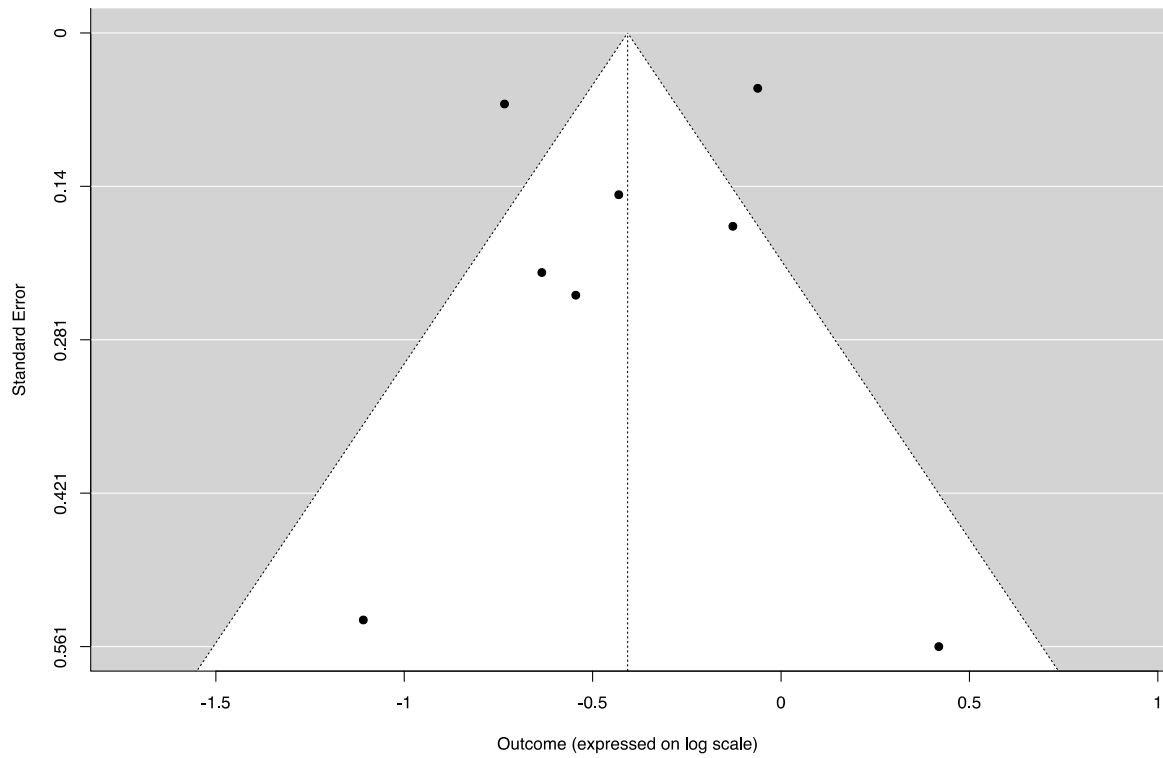

## References

1. Avila A, Claes J, Goetschalckx K, et al. Home-based rehabilitation with telemonitoring guidance for patients with coronary artery disease (short-term results of the TRiCH study): Randomized controlled trial. *J Med Internet Res*. 2018;20(6):e225.
2. Bhavnani SP, Sola S, Adams D, et al. A randomized trial of pocket-echocardiography integrated mobile health device assessments in modern structural heart disease clinics. *JACC Cardiovasc Imaging*. 2018;11(4):546–57.
3. Blasco A, Carmona M, Fernández-Lozano I, et al. Evaluation of a telemedicine service for the secondary prevention of coronary artery disease. *J Cardiopulm Rehabil Prev*. 2012;32(1):25–31.
4. Devi R, Powell J, Singh S. A web-based program improves physical activity outcomes in a primary care angina population: Randomized controlled trial. *J Med Internet Res*. 2014;16(9).
5. Frederix I, Driessche N Van, Hansen D, et al. Increasing the medium-term clinical benefits of hospital-based cardiac rehabilitation by physical activity telemonitoring in coronary artery disease patients. *Eur J Prev Cardiol*. 2015;22(2):150–8.
6. Reid RD, Morrin LI, Beaton LJ, et al. Randomized trial of an internet-based computer-tailored expert system for physical activity in patients with heart disease. *Eur J Prev Cardiol*. 2012;19(6):1357–64.
7. Rosario MBD, Lovell NH, Fildes J, et al. Evaluation of an mHealth-based adjunct to outpatient cardiac rehabilitation. *IEEE J Biomed Health Inform*. 2018;22(6):1938–48.
8. Sankaran S, Dendale P, Coninx K. Evaluating the impact of the hearthab app on motivation, physical activity, quality of life, and risk factors of coronary artery disease patients: Multidisciplinary crossover study. *JMIR mHealth uHealth*. 2019;7(4):e10874.
9. Southard BH, Southard DR, Nuckolls J. Clinical trial of an internet-based case management system for secondary prevention of heart disease. *J Cardiopulm Rehabil*. 2003;23(5):341–8.
10. Thorup C, Hansen J, Gronkjaer M, et al. Cardiac patients' walking activity determined by a step counter in cardiac telerehabilitation: data from the intervention arm of a randomized controlled trial. *J Med Internet Res*. 2016;18(4):e69.
11. Varma N, Epstein AE, Irimpen A, Schweikert R, Love C; TRUST Investigators. Efficacy and safety of automatic remote monitoring for implantable cardioverter-defibrillator follow-up: The Lumos-T safely reduces routine office device follow-up (TRUST) trial. *Circulation*. 2010;122(4):325–32.
12. Vernooij JWP, Kaasjager HAH, Van Der Graaf Y, et al. Internet based vascular risk factor management for patients with clinically manifest vascular disease: Randomised controlled trial. *BMJ*. 2012;344(7863):1–13.
13. Wister A, Loewen N, Kennedy-Symonds H, McGowan B, McCoy B, Singer J. One-year follow-up of a therapeutic lifestyle intervention targeting cardiovascular disease risk. *CMAJ*. 2007;177(8):859–65.
14. Wolf A, Fors A, Ulin K, Thorn J, Swedberg K, Ekman I. An eHealth diary and symptom-tracking tool combined with person-centered care for improving self-efficacy after a diagnosis of acute coronary syndrome: A substudy of a randomized controlled trial. *J Med Internet Res*. 2016;18(2):e40.
15. Zutz A, Ignaszewski A, Bates J, Lear SA. Utilization of the internet to deliver cardiac rehabilitation at a distance: A pilot study. *Telemed J E Health*. 2007;13(3):323–30.
16. Ades PA, Pashkow FJ, Fletcher G, Pina IL, Zohman LR, Nestor JR. A controlled trial of cardiac rehabilitation in the home setting using electrocardiographic and voice transtelephonic monitoring. *Am Heart J*. 2000;139(3):543–8.

17. Macedo TA, De Barros E Silva PGM, Simões SA, et al. Impact of chest pain protocol with access to telemedicine on implementation of pharmacoinvasive strategy in a private hospital network. *Telemed e-Health*. 2016;22(7):549–52.
18. Parahuleva MS, Soydan N, Divchev D, Lüsebrink U, Schieffer B, Erdogan A. Home monitoring after ambulatory implanted primary cardiac implantable electronic devices: The home ambulance pilot study. *Clin Cardiol*. 2017;40(11):1068–75.
19. Wong N, Chua SJT, Gao F, et al. The effect of a nurse-led telephone-based care coordination program on the follow-up and control of cardiovascular risk factors in patients with coronary artery disease. *Int J Qual Heal Care*. 2016;28(6):758–63.
20. Ammenwerth E, Woess S, Baumgartner C, et al. Evaluation of an integrated telemonitoring surveillance system in patients with coronary heart disease. *Methods Inf Med*. 2015;54(5):388–97.
21. Hart D, Hopman WM, Hammond S, Redfearn DP. Augmenting atrial fibrillation care after an emergency department visit: Implementing telephone practice. *J Nurs Care Qual*. 2019;34(4):337–9.
22. Appel LJ, Clark JM, Yeh HC, et al. Comparative effectiveness of weight-loss interventions in clinical practice. *N Eng J Med*. 2011;365(21):1959–68.
23. Bennett GG, Herring SJ, Puleo E, Stein EK, Emmons KM, Gillman MW. Web-based weight loss in primary care: a randomized controlled trial. *Obes (Silver Spring)*. 2010;18(2):303–13.
24. Bennett GG, Warner ET, Glasgow RE, et al. Obesity treatment for socioeconomically disadvantaged patients in primary care practice. *Arch Intern Med*. 2012;172(7):565–74.
25. Broekhuizen K, van Poppel MN, Koppes LL, Kindt I, Brug J, van Mechelen W. No significant improvement of cardiovascular disease risk indicators by a lifestyle intervention in people with familial hypercholesterolemia compared to usual care: Results of a randomised controlled trial. *BMC Res Notes*. 2012;5:181.
26. Claes N, Jacobs N, Clays E, Schrooten W, De Bourdeaudhuij I. Comparing the effectiveness of two cardiovascular prevention programmes for highly educated professionals in general practice: A randomised clinical trial. *BMC Cardiovasc Disord*. 2013;13(38).
27. Green BB, Anderson ML, Cook AnJ, al. E-care for heart wellness: A feasibility trial to decrease blood pressure and cardiovascular risk. *Am J Prev Med*. 2014;46(4):368–77.
28. Jacobs N, De Bourdeaudhuij I, Thijs H, Dendale P, Claes N. Effect of a cardiovascular prevention program on health behavior and BMI in highly educated adults: A randomized controlled trial. *Patient Educ Couns*. 2011;85(1):122–6.
29. Kiselev AR, Gridnev VI, Shvartz VA, Posnenkova OM, Dovgalevsky PY. Active ambulatory care management supported by short message services and mobile phone technology in patients with arterial hypertension. *J Am Soc Hypertens*. 2012;6(5):346–55.
30. Mendelson M, Vivodtzev I, Tamisier R, et al. CPAP treatment supported by telemedicine does not improve blood pressure in high cardiovascular risk OSA patients: A randomized, controlled trial. *Sleep*. 2014;37(11):1863-70.
31. Verheijden M, Bakx JC, Akkermans R, et al. Web-based targeted nutrition counselling and social support for patients at increased cardiovascular risk in general practice: Randomized controlled trial. *J Med Internet Res*. 2004;6(4):e44.
32. Park MJ, Kim HS. Evaluation of mobile phone and Internet intervention on waist circumference and blood pressure in post-menopausal women with abdominal obesity. *Int J Med Inform*. 2012;81(6):388–94.
33. Randolph GR, Hagler DJ, Khandheria BK, et al. Remote telemedical interpretation of

neonatal echocardiograms: Impact on clinical management in a primary care setting. J Am Coll Cardiol. 1999;34(1):241-5.
